# Supplementary material for: Effect of Copper Sulphate Exposure on the Oxidative Stress, Gill Transcriptome and External Microbiota of Yellow Catfish, Pelteobagrus fulvidraco
Source: MDPI journal article supplement (doi:10.3390/antiox12061288), 2023-06-16
Supplement: s1 [file s1]

## Supporting Information

Effect of copper sulphate exposure on the oxidative stress, gill transcriptome and external microbiota of yellow catfish, *Pelteobagrus fulvidraco*

Shun Zhou <sup>1,2</sup>, Qiuhong Yang <sup>1,2</sup>, Yi Song <sup>3,4</sup>, Bo Cheng <sup>3,4,\*</sup> and Xiaohui Ai <sup>1,2,\*</sup>

<sup>1</sup> Yangtze River Fisheries Research Institute, Chinese Academy of Fishery Sciences, Wuhan 430223, China

<sup>2</sup> Hu Bei Province Engineering and Technology Research Center of Aquatic Product Quality and Safety, Wuhan 430223, China

<sup>3</sup> Chinese Academy of Fishery Sciences, No.150, Qingta West Road, Fengtai District, Beijing 100141, China

<sup>4</sup> Key Laboratory of Aquatic Product Quality and Safety Control, Ministry of Agriculture, No.150, Qingta West Road, Fengtai District, Beijing 100141, China

\* Correspondence: chengb@cafs.ac.cn (B.C.); aixh@yfi.ac.cn (X.A.)

**Table S1.** The primers used in the quantitative PCR analysis.

| Name     | Forward primers (5'-3') | Reverse primers (5'-3')  | Accession no. |
|----------|-------------------------|--------------------------|---------------|
| CCL2     | CCTGCCTTCAGTCCTTCACAAT  | ACTGATCTGGTACATTCTCTTCTC | OR062247      |
| TNFRSF5  | TCTCCTGAAGGTGTGAACTGC   | AGGTATTTGACCAGATGCCATGA  | OR062248      |
| TCN1     | AACTACGGCCCATTCCTTGT    | GCTGTGTCAAATGGGTTTGGT    | OR062249      |
| HSP90AA1 | TCAGTAGAGGGCCAACTGGA    | AGACTCTGCGCACATAGAGC     | OR062250      |
| NEU3     | GCACCATGAATCCGTGTCCT    | CTTCCCTGTCCTTATCTGGTGT   | OR062251      |
| F8       | TTACGTCGTCAAGCCCACTC    | GCGCTGCCTTCTTGTTAAG      | OR062252      |
| TUBB3    | CCAACAGTACCGCGCTCTTA    | CCGTGCTGTTGCCGATAAAG     | OR062253      |
| RGS16    | GGATGCGCTCAAGTGGAAG     | CAGACATCAGGAACACCCGA     | OR062254      |
| CCR8     | GCTGGGCAATGGTTTGGTTC    | ACTTGCATCCCATCTTGCCA     | OR062255      |
| Elfa     | GTCTGGAGATGCTGCCATTG    | AGCCTTCTTCTCAACGCTCT     | KU886307      |

Abbreviations: CCL2, C-C motif chemokine 2-like; TNFRSF5, tumor necrosis factor receptor superfamily member 5-like; TCN1, transcobalamin-1-like isoform X1; HSP90AA1, heat shock protein HSP 90- $\alpha$  1; NEU3, sialidase-3-like; F8, coagulation factor VIII-like; TUBB3, tubulin beta-3 chain; RGS16, regulator of G-protein signaling 16-like; CCR8, C-C chemokine receptor type 8-like; Elfa, translation elongation factor 1- $\alpha$  1.

**Table S2.** Summary statistics of the transcriptome sequences. CG: 0 mg/L copper sulphate; TG: 0.7 mg/L copper sulphate.

| Sample | Clean reads | Clean bases   | GC content (%) | Q30 (%) | Total Mapped reads (ratio) | Uniquely mapped reads (ratio) | Multiple mapped reads (ratio) |
|--------|-------------|---------------|----------------|---------|----------------------------|-------------------------------|-------------------------------|
| CG1    | 22,813,750  | 6,804,749,242 | 46.05%         | 94.79%  | 33,728,222<br>(73.92%)     | 31,900,936<br>(69.92%)        | 1,827,286<br>(4.00%)          |
| CG2    | 23,041,240  | 6,879,498,494 | 45.78%         | 93.98%  | 33,625,353<br>(72.97%)     | 31,965,235<br>(69.37%)        | 1,660,118<br>(3.60%)          |
| CG3    | 26,233,930  | 7,832,889,386 | 45.95%         | 94.20%  | 38,687,544<br>(73.74%)     | 36,747,590<br>(70.04%)        | 1,939,954<br>(3.70%)          |
| TG1    | 25,036,723  | 7,459,653,852 | 45.98%         | 94.80%  | 37,166,231<br>(74.22%)     | 35,254,330<br>(70.41%)        | 1,911,901<br>(3.82%)          |
| TG2    | 24,412,195  | 7,286,585,586 | 45.90%         | 94.74%  | 36,188,760<br>(74.12%)     | 34,365,123<br>(70.39%)        | 1,823,637<br>(3.74%)          |
| TG3    | 23,959,591  | 7,154,763,972 | 45.80%         | 94.41%  | 35,487,906<br>(74.06%)     | 33,442,507<br>(69.79%)        | 2,045,399<br>(4.27%)          |

**Table S3.** Representative immune-related DEGs in yellow catfish after exposure to copper sulphate.

| Gene ID                                       | Gene description                                                                      | Change | log2FoldChange | FDR      |
|-----------------------------------------------|---------------------------------------------------------------------------------------|--------|----------------|----------|
| <b>Cytokine-cytokine receptor interaction</b> |                                                                                       |        |                |          |
| gene_14548                                    | C-X-C chemokine receptor type 4-like                                                  | up     | 1.767553       | 0.000166 |
| Tachysurus_fulvidraco_newGene_5764            | C-C motif chemokine 24-like                                                           | down   | -1.79552       | 0.004344 |
| gene_8371                                     | C-C chemokine receptor type 8-like                                                    | down   | -3.39556       | 0.000151 |
| gene_20740                                    | interleukin-13 receptor subunit alpha-1-like isoform X1                               | down   | -1.13274       | 0.001362 |
| gene_1927                                     | C-C motif chemokine 2-like                                                            | up     | 2.394937       | 2.52E-05 |
| gene_11637                                    | tumor necrosis factor receptor superfamily member 5-like                              | up     | 4.822969       | 4.64E-07 |
| gene_25805                                    | interleukin-4 receptor subunit alpha-like                                             | down   | -1.29709       | 0.002819 |
| gene_11027                                    | regakine-1-like                                                                       | down   | -1.97259       | 3.35E-06 |
| <b>NOD-like receptor signaling pathway</b>    |                                                                                       |        |                |          |
| gene_1763                                     | permeability factor 2-like                                                            | down   | -3.19332       | 2.35E-17 |
| gene_8551                                     | thioredoxin-interacting protein-like                                                  | up     | 1.194068       | 0.000484 |
| gene_2649                                     | heat shock protein HSP 90-alpha 1                                                     | up     | 1.772629       | 0.000385 |
| gene_17388                                    | arrestin domain-containing protein 2-like                                             | up     | 1.605294       | 1.16E-18 |
| gene_25109                                    | interferon-induced very large GTPase 1-like                                           | down   | -1.46529       | 2.43E-06 |
| gene_1764                                     | C-X-C motif chemokine 3-like isoform X1                                               | down   | -3.05904       | 5.42E-05 |
| gene_24531                                    | thioredoxin-interacting protein-like                                                  | up     | 1.344409       | 2.79E-18 |
| <b>Apoptosis</b>                              |                                                                                       |        |                |          |
| gene_1241                                     | calpain-2 catalytic subunit-like                                                      | down   | -3.66568       | 0.005042 |
| gene_1237                                     | calpain-2 catalytic subunit-like                                                      | down   | -1.7344        | 0.000764 |
| gene_21018                                    | interferon-induced protein 44-like isoform X1                                         | down   | -1.26364       | 0.00199  |
| gene_20615                                    | interferon-induced protein 44-like isoform X1                                         | down   | -1.27477       | 0.000468 |
| gene_9008                                     | perforin-1-like isoform X1                                                            | up     | 1.028376       | 1.16E-07 |
| <b>MAPK signaling pathway</b>                 |                                                                                       |        |                |          |
| gene_7728                                     | ephrin-A1-like                                                                        | up     | 1.19025        | 1.17E-17 |
| Tachysurus_fulvidraco_newGene_1639            | uncharacterized protein LOC113546666                                                  | down   | -1.66612       | 1.83E-05 |
| gene_11717                                    | dihydropyridine-sensitive L-type skeletal muscle calcium channel subunit alpha-1-like | up     | 1.605011       | 0.001332 |

**Phagosome**

|            |                                                                    |      |          |          |
|------------|--------------------------------------------------------------------|------|----------|----------|
| gene_1494  | macrophage mannose receptor 1-like                                 | down | -1.17446 | 0.000542 |
| gene_19386 | BOLA class I histocompatibility<br>antigen, alpha chain BL3-7-like | down | -1.67818 | 0.000194 |
| gene_5057  | tubulin beta-3 chain                                               | down | -2.825   | 0.009038 |
| gene_19380 | BOLA class I histocompatibility<br>antigen, alpha chain BL3-7-like | down | -1.28525 | 0.007084 |

**C-type lectin receptor signaling**

|            |                                            |      |              |             |
|------------|--------------------------------------------|------|--------------|-------------|
| pathway    |                                            |      |              |             |
| gene_12290 | prostaglandin G/H synthase 2-like          | down | -1.193716184 | 9.20E-13    |
| gene_21978 | NF-kappa-B inhibitor alpha                 | up   | 1.127681941  | 3.95E-21    |
| gene_8617  | CD209 antigen-like protein D isoform<br>X1 | down | -1.187651252 | 5.22E-05    |
| gene_13832 | interleukin-1 beta-like                    | down | -1.868913751 | 0.000150372 |

**Complement and coagulation cascades**

|            |                              |      |              |          |
|------------|------------------------------|------|--------------|----------|
| gene_17998 | coagulation factor VIII-like | down | -2.508584976 | 2.68E-16 |
|------------|------------------------------|------|--------------|----------|

---

**Table S4.** Characteristics of 16S rRNA sequences of yellow catfish (*Pelteobagrus fulvidraco*) gills. C: 0 mg/L copper sulphate; T: 0.7 mg/L copper sulphate.

| Samples | Raw Reads | Clean Reads | Denoised Reads | Merged Reads | Non-chimeric Reads |
|---------|-----------|-------------|----------------|--------------|--------------------|
| C1      | 80,067    | 79,918      | 79,538         | 77,668       | 72,970             |
| C2      | 80,214    | 80,062      | 79,921         | 78,761       | 73,980             |
| C3      | 80,532    | 80,380      | 80,260         | 79,913       | 73,190             |
| C4      | 79,736    | 79,578      | 79,226         | 77,686       | 71,999             |
| C5      | 79,889    | 79,732      | 79,663         | 79,386       | 74,687             |
| T1      | 80,102    | 79,964      | 79,867         | 79,594       | 76,765             |
| T2      | 80,042    | 79,915      | 79,783         | 79,048       | 76,427             |
| T3      | 80,083    | 79,955      | 79,849         | 79,560       | 75,088             |
| T4      | 80,295    | 80,165      | 80,078         | 79,289       | 75,561             |
| T5      | 79,907    | 79,777      | 79,446         | 77,878       | 73,810             |

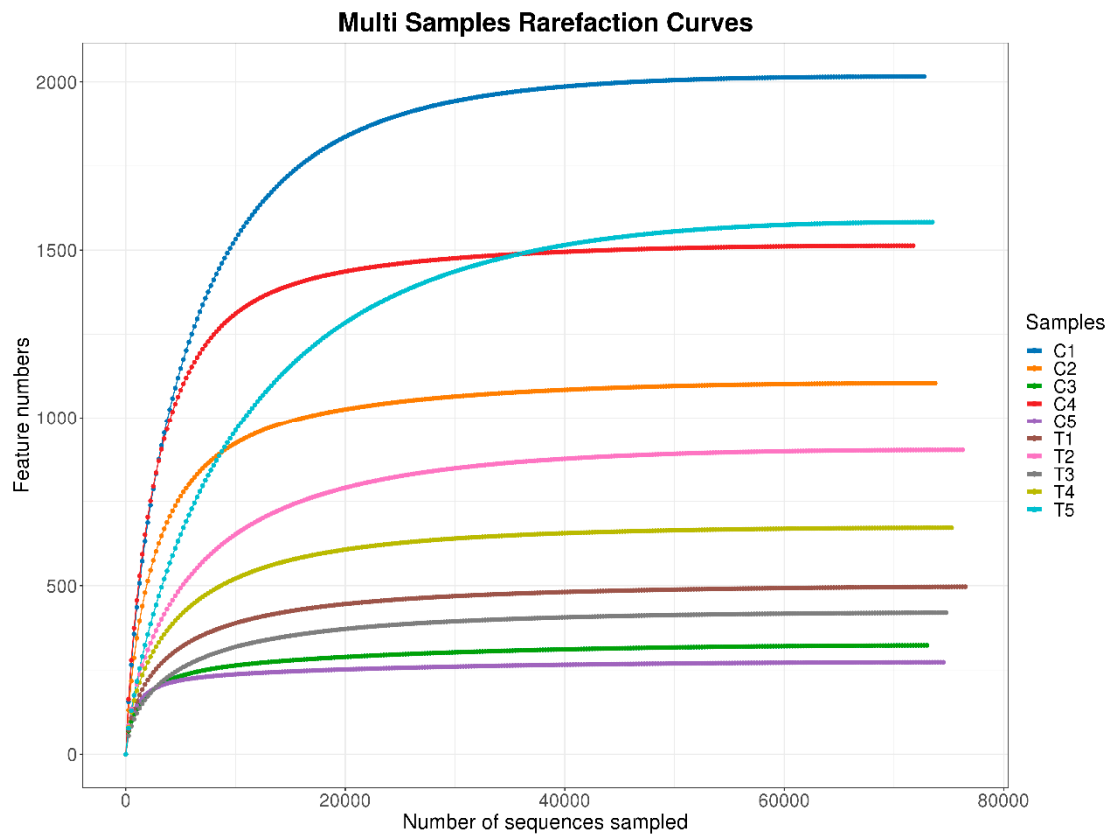

**Figure S1.** Rarefaction curves of yellow catfish (*Pelteobagrus fulvidraco*) gills tissue samples. C1-C5: control group; T1-T5: 0.7 mg/L copper sulphate exposed group.

**Table S5.** Richness and diversity indices of bacterial communities for all gill tissue samples. C: 0 mg/L copper sulphate; T: 0.7 mg/L copper sulphate.

| Sample | Feature | ACE        | Chao1      | Simpson | Shannon | PD whole tree | Coverage |
|--------|---------|------------|------------|---------|---------|---------------|----------|
| C1     | 2,016   | 2,016.1577 | 2,016.0    | 0.9876  | 8.6262  | 176.7335      | 1.0      |
| C2     | 1,104   | 1,104.2607 | 1,104.0    | 0.9806  | 7.6941  | 94.3179       | 1.0      |
| C3     | 323     | 325.9569   | 323.6176   | 0.9575  | 5.6062  | 58.6491       | 0.9999   |
| C4     | 1,513   | 1,513.2642 | 1,513.0    | 0.9906  | 8.76    | 137.0542      | 1.0      |
| C5     | 273     | 273.9218   | 273.037    | 0.9608  | 5.9133  | 45.1908       | 1.0      |
| T1     | 497     | 499.8154   | 498.5      | 0.8734  | 5.1443  | 56.8091       | 0.9999   |
| T2     | 903     | 903.6283   | 903.0484   | 0.9142  | 5.8949  | 88.8075       | 1.0      |
| T3     | 420     | 422.0979   | 420.9032   | 0.7938  | 4.2062  | 52.0025       | 0.9999   |
| T4     | 672     | 673.0993   | 672.25     | 0.8675  | 5.3941  | 77.8169       | 0.9999   |
| T5     | 1,583   | 1,583.4281 | 1,583.0056 | 0.8344  | 5.3253  | 130.5898      | 1.0      |



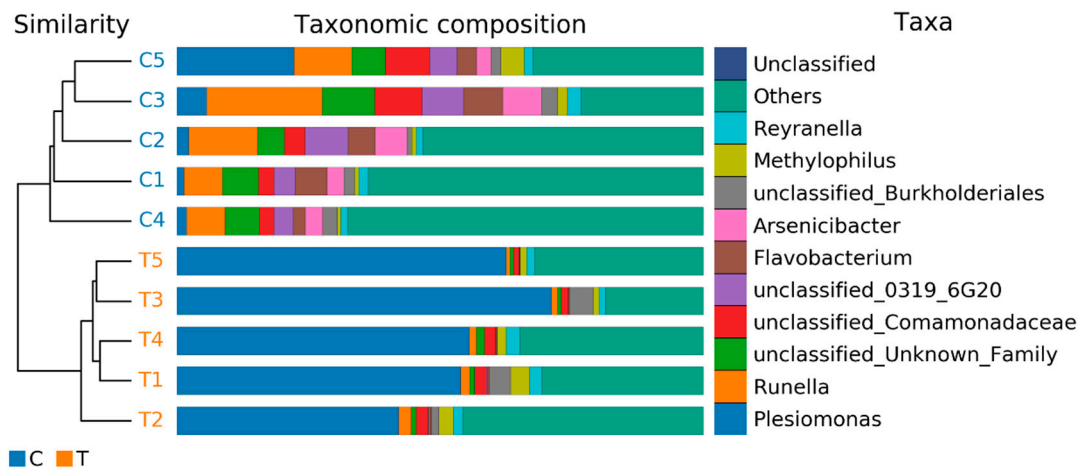

**Figure S2.** (Left) Hierarchical cluster analysis based on the unweighted pair group method with arithmetic mean (UPGMA); (Right) Relative abundances of dominant microbial genera. C: copper sulphate; T: 0.7 mg/L copper sulphate.

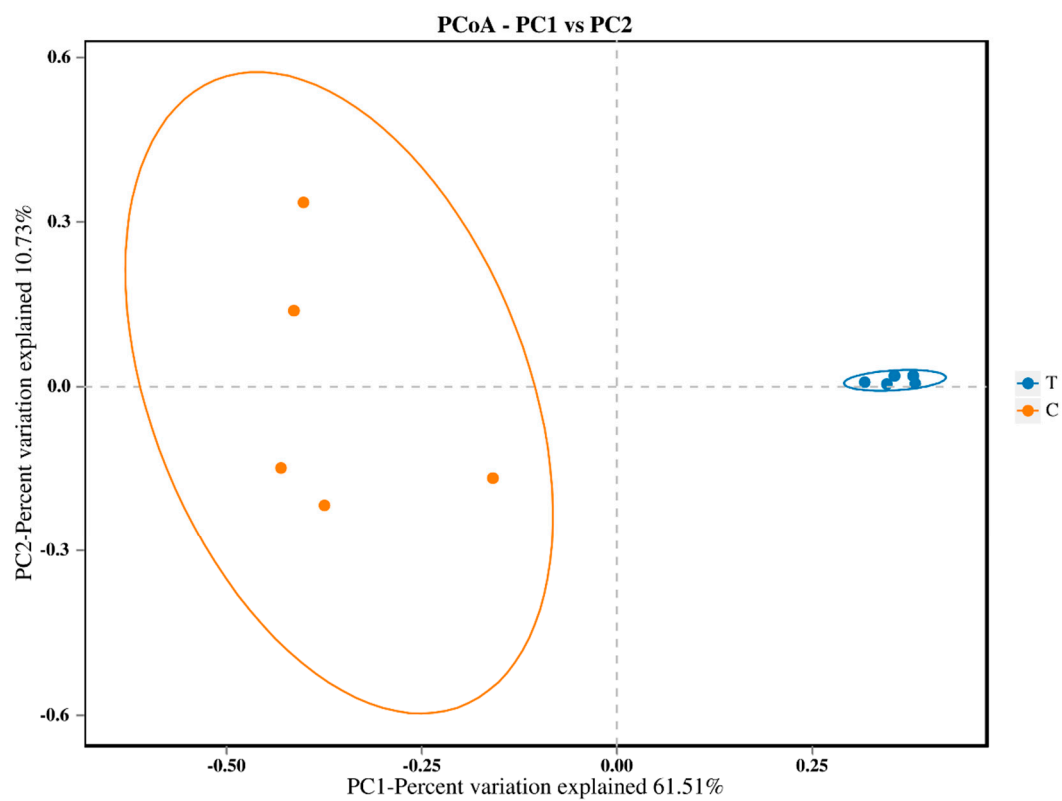

**Figure S3.** Principal coordinates analysis (PCoA) of the microbial communities. C: 0 mg/L copper sulphate; T: 0.7 mg/L copper sulphate.
